# Supplementary material for: Impact of the Liquid Crystal Order of Poly(azomethine-sulfone)s on the Semiconducting Properties
Source: MDPI journal article supplement (doi:10.3390/polym14071487), 2022-04-06
Supplement: s1 [file s1]

Supporting Information for

# Impact of the Liquid Crystal Order of Poly(Azomethine-Sulfone)s on the Semiconducting Properties

Oana Dumbravă <sup>1</sup>, Dumitru Popovici <sup>1</sup>, Decebal Vasincu <sup>2</sup>, Ovidiu Popa <sup>3</sup>, Lăcrămioara Ochiuz <sup>4</sup>, Ștefan-Andrei Irimiciuc <sup>5,\*</sup>, Maricel Agop <sup>6,7,\*</sup> and Anca Negură <sup>8</sup>

<sup>1</sup> “Petru Poni” Institute of Macromolecular Chemistry, Gr. Ghica Voda Alley, 41A, 700487 Iasi, Romania; dumbrava.oana@icmpp.ro (O.D.); dimitru.popovici@icmpp.ro (D.P.)

<sup>2</sup> Department of Biophysics and Medical Physics, Faculty of Dental Medicine, “Grigore T. Popa” University of Medicine and Pharmacy, 16 University Str., 700115 Iasi, Romania; decebal.vasincu@umfiasi.ro

<sup>3</sup> Department of Emergency Medicine, Faculty of Medicine, “Grigore T. Popa” University of Medicine and Pharmacy, 16 University Str., 700115 Iasi, Romania; ovidiu.popa@umfiasi.ro

<sup>4</sup> Department of Pharmaceutical Sciences, Faculty of Pharmacy, “Grigore T. Popa” University of Medicine and Pharmacy, 16 University Str., 700115 Iasi, Romania; lacramioara.ochiuz@umfiasi.ro

<sup>5</sup> National Institute for Laser, Plasma and Radiation Physics, 409 Atomistilor Street, 077125 Bucharest, Romania

<sup>6</sup> Department of Physics, “Gh. Asachi” Technical University of Iasi, 700050 Iasi, Romania

<sup>7</sup> Romanian Scientists Academy, 54 Splaiul Independentei, 050094 Bucharest, Romania

<sup>8</sup> Faculty of Biology, “Alexandru Ioan Cuza” University of Iasi, 2A Carol Boulevard, 700505 Iasi, Romania; anca.negura@uaic.ro

\* Correspondence: stefan.irimiciuc@inflpr.ro (Ș.-A.I.); magop@tuiasi.ro (M.A.)

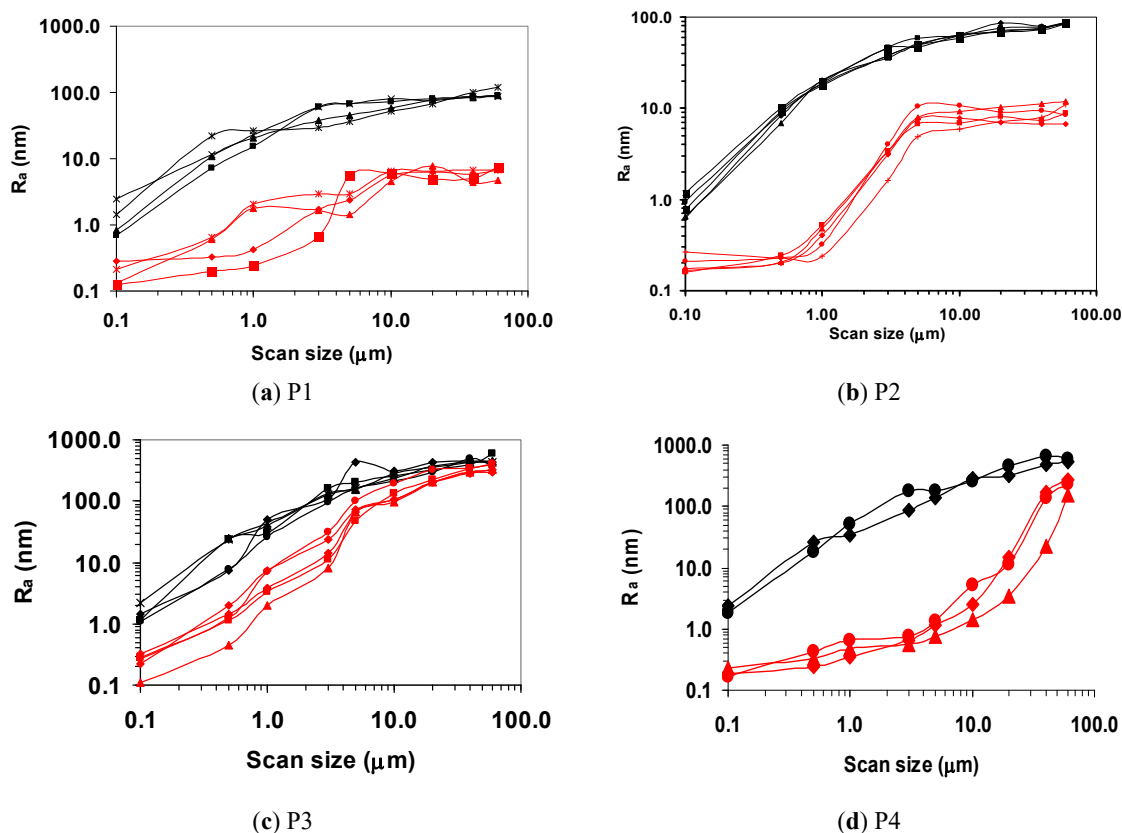

**Figure S1.** Double logarithmic representation of roughness *versus* scan size of untreated (black lines) and treated (red lines) P1(a), P2 (b), P3(c) and P4 (d) film.

**Table S1.** Average values of Ra and its standard deviation at scan size of 1000 nm x 1000 nm.

| Sample Code | P1          | P1*        | P2          | P2*        | P3         | P3*        | P4          | P4*        |
|-------------|-------------|------------|-------------|------------|------------|------------|-------------|------------|
| Ra(nm)      | 20.25 ± 2.0 | 1.10 ± 0.4 | 17.64 ± 0.8 | 0.38 ± 0.1 | 37.0 ± 3.9 | 4.27 ± 1.0 | 39.53 ± 4.6 | 0.45 ± 0.1 |
